# Supplementary material
Source: Springer Nature journal article supplement (https://www.springermedizin.de/resource/supplementary/12906_2011_494_MOESM2_ESM.pdf/9519594)
Supplement: MOESM2 [file 9519594]

**Table 1 A brief study schedule at every visit.**

|                                                 | Screening<br>Visit 1  | Baseline<br>Visit 2   | Visit 3               | Visit 4               | Visit 5               | Follow up<br>(Visit 6) |
|-------------------------------------------------|-----------------------|-----------------------|-----------------------|-----------------------|-----------------------|------------------------|
|                                                 | D-21<br>~D-1          | Week 0<br>D0          | Week 4<br>D28         | Week 8<br>D56         | Week 12<br>D84        | Week 16<br>D112        |
| Informed consent form                           | <input type="radio"/> |                       |                       |                       |                       |                        |
| Demographic information taking <sup>1</sup>     | <input type="radio"/> |                       |                       |                       |                       |                        |
| Medical history taking                          | <input type="radio"/> |                       |                       |                       |                       |                        |
| Inclusion/exclusion criteria check              | <input type="radio"/> | <input type="radio"/> |                       |                       |                       |                        |
| Physician examination <sup>2</sup>              | <input type="radio"/> |                       |                       |                       | <input type="radio"/> |                        |
| Drinking/smoking taking status <sup>3</sup>     | <input type="radio"/> |                       |                       |                       | <input type="radio"/> |                        |
| Vital sign measurement                          | <input type="radio"/> |                        |
| Concomitant drugs check                         | <input type="radio"/> |                        |
| Electrocardiogram(ECG)                          | <input type="radio"/> |                       |                       |                       | <input type="radio"/> |                        |
| Histamine skin prick test                       | <input type="radio"/> |                       |                       |                       | <input type="radio"/> |                        |
| Laboratory test <sup>4</sup>                    | <input type="radio"/> |                       |                       |                       | <input type="radio"/> |                        |
| Histamine & ECP                                 |                       | <input type="radio"/> |                       |                       | <input type="radio"/> |                        |
| Study product distribution                      |                       | <input type="radio"/> | <input type="radio"/> | <input type="radio"/> |                       |                        |
| Compliance checking                             |                       |                       | <input type="radio"/> | <input type="radio"/> | <input type="radio"/> |                        |
| Adverse event monitoring                        |                       |                       | <input type="radio"/> | <input type="radio"/> | <input type="radio"/> | <input type="radio"/>  |
| Diet, physical exercise counseling <sup>5</sup> |                       | <input type="radio"/> | <input type="radio"/> | <input type="radio"/> |                       |                        |

○ : Item need to be perform during the visit

<sup>1</sup> Sex, date of birth, age, contact address and phone number

<sup>2</sup> Include present illness, past history taking

<sup>3,5</sup> Risk factors such as alcohol drinking, smoking, severe exercise and other dietary supplement intake will be managed

<sup>4</sup> Blood test(WBC, RBC, hemoglobin, hematocrit, platelets count, AST, ALT, ALP, gamma-GTP, , albumin, BUN, creatinine, glucose, total bilirubin, total protein, total-cholesterol, triglyceride, LDL-C, HDL-C, IgE), urine test(specific gravity, pH, Protein, Ketone, Glucose, bilirubin, urobilinogen, nitrite, microscopic (RBC, WBC))
